# Supplementary material for: Evaluation of Alignment between the Health Claims Nutrient Profiling Scoring Criterion (NPSC) and the Health Star Rating (HSR) Nutrient Profiling Models
Source: MDPI journal article supplement (doi:10.3390/nu10081065), 2018-08-10
Supplement: s1 [file s1]

**Table S1:** Agreement between the number of products scoring  $\geq 3.5$  stars using the Health Star Rating and the proportion of products eligible to display a health claim using the Nutrient Profiling Scoring Criterion

| Category                                   | No. of products <3.5 Health Star Rating eligible to display health claim (%) | No. of products $\geq 3.5$ Health Star Rating ineligible to display health claim (%) |
|--------------------------------------------|------------------------------------------------------------------------------|--------------------------------------------------------------------------------------|
| <b>Bread and bakery products</b>           | <b>92 (1.80%)</b>                                                            | <b>15 (0.29%)</b>                                                                    |
| Biscuits                                   | 29 (1.31%)                                                                   | 7 (0.32%)                                                                            |
| Bread                                      | 47 (3.21%)                                                                   | 4 (0.27%)                                                                            |
| Cakes, muffins and pastries                | 16 (1.10%)                                                                   | 4 (0.28%)                                                                            |
| <b>Cereal and cereal products</b>          | <b>101 (2.24%)</b>                                                           | <b>69 (1.53%)</b>                                                                    |
| Breakfast cereals                          | 13 (0.92%)                                                                   | 25 (1.77%)                                                                           |
| Cereal and nut-based bars                  | 8 (1.13%)                                                                    | 21 (2.95%)                                                                           |
| Couscous                                   | 0 (0.00%)                                                                    | 0 (0.00%)                                                                            |
| Noodles                                    | 39 (8.99%)                                                                   | 0 (0.00%)                                                                            |
| Pasta                                      | 26 (2.85%)                                                                   | 6 (0.66%)                                                                            |
| Rice                                       | 9 (2.63%)                                                                    | 4 (1.17%)                                                                            |
| Other cereal and grain products            | 6 (0.97%)                                                                    | 13 (2.10%)                                                                           |
| <b>Confectionery</b>                       | <b>79 (2.15%)</b>                                                            | <b>2 (0.05%)</b>                                                                     |
| Chocolate and sweets                       | 12 (0.35%)                                                                   | 2 (0.06%)                                                                            |
| Jelly                                      | 54 (39.42%)                                                                  | 0 (0.00%)                                                                            |
| Chewing gum                                | 3 (3.03%)                                                                    | 0 (0.00%)                                                                            |
| Cough lollies                              | 10 (32.26%)                                                                  | 0 (0.00%)                                                                            |
| <b>Convenience foods</b>                   | <b>272 (9.77%)</b>                                                           | <b>32 (1.15%)</b>                                                                    |
| Pizza                                      | 6 (3.59%)                                                                    | 7 (4.19%)                                                                            |
| Pre-prepared salads and sandwiches         | 35 (7.64%)                                                                   | 1 (0.22%)                                                                            |
| Ready meals                                | 89 (7.02%)                                                                   | 24 (1.89%)                                                                           |
| Soup                                       | 140 (16.11%)                                                                 | 0 (0.00%)                                                                            |
| Other frozen foods not otherwise specified | 2 (9.52%)                                                                    | 0 (0.00%)                                                                            |

|                                            |                     |                    |
|--------------------------------------------|---------------------|--------------------|
| <b>Dairy</b>                               | <b>409 (7.42%)</b>  | <b>317 (5.75%)</b> |
| Cheese                                     | 9 (0.65%)           | 56 (4.07%)         |
| Cream                                      | 2 (1.20%)           | 0 (0.00%)          |
| Desserts                                   | 33 (7.97%)          | 0 (0.00%)          |
| Ice cream and edible ices                  | 29 (2.86%)          | 1 (0.10%)          |
| Milk                                       | 1 (0.08%)           | 260 (21.21%)       |
| Yoghurt and yoghurt drinks                 | 335 (25.42%)        | 0 (0.00%)          |
| <b>Edible oils</b>                         | <b>153 (19.92%)</b> | <b>0 (0.00%)</b>   |
| Cooking oils                               | 67 (18.72%)         | 0 (0.00%)          |
| Edible oils                                | 81 (24.40%)         | 0 (0.00%)          |
| Cooking oil spray                          | 5 (15.15%)          | 0 (0.00%)          |
| Coconut oil                                | 0 (0.00%)           | 0 (0.00%)          |
| <b>Seafood and seafood products</b>        | <b>10 (0.72%)</b>   | <b>119 (8.56%)</b> |
| <b>Fruit, vegetables, nuts and legumes</b> | <b>257 (5.22%)</b>  | <b>235 (4.77%)</b> |
| Fruit                                      | 179 (12.96%)        | 59 (4.27%)         |
| Dried herbs and spices                     | 9 (2.06%)           | 0 (0.00%)          |
| Jam and marmalades                         | 2 (0.50%)           | 3 (0.75%)          |
| Nuts and seeds                             | 6 (0.68%)           | 173 (19.70%)       |
| Vegetables                                 | 61 (3.33%)          | 0 (0.00%)          |
| <b>Meat and meat alternatives</b>          | <b>31 (1.17%)</b>   | <b>241 (9.10%)</b> |
| Meat alternatives                          | 7 (3.10%)           | 3 (1.33%)          |
| Processed meat                             | 24 (0.99%)          | 238 (9.83%)        |
| <b>Non-alcoholic beverages</b>             | <b>678 (19.45%)</b> | <b>11 (0.32%)</b>  |
| Coffee and tea                             | 38 (16.59%)         | 4 (1.75%)          |
| Cordials                                   | 85 (41.87%)         | (0.00%)            |
| Electrolyte drinks                         | 11 (15.94%)         | (0.00%)            |
| Energy drinks                              | 27 (21.26%)         | (0.00%)            |
| Fruit and vegetable juices                 | 40 (2.74%)          | 0 (0.00%)          |
| Soft drinks                                | 299 (29.72%)        | (0.00%)            |
| Waters                                     | 163 (52.75%)        | 2 (0.65%)          |

|                                      |                     |                     |
|--------------------------------------|---------------------|---------------------|
| Beverage mixes                       | 15 (18.52%)         | 5 (6.17%)           |
| <b>Sauces, dressings and spreads</b> | <b>208 (4.58%)</b>  | <b>59 (1.30%)</b>   |
| Mayonnaise and salad dressings       | 9 (1.65%)           | 0 (0.00%)           |
| Sauces                               | 130 (4.73%)         | 13 (0.47%)          |
| Spreads and dips                     | 69 (5.55%)          | 46 (3.70%)          |
| <b>Snack foods</b>                   | <b>68 (4.24%)</b>   | <b>15 (0.93%)</b>   |
| <b>Foods for special dietary use</b> | <b>0 (0.00%)</b>    | <b>15 (4.72%)</b>   |
| Diet drink mixes (meal replacements) | 0 (0.00%)           | 4 (2.67%)           |
| Diet soup mixes (meal replacements)  | 0 (0.00%)           | 0 (0.00%)           |
| Breakfast beverages                  | NA                  | 11 (6.88%)          |
| <b>Total</b>                         | <b>2358 (5.71%)</b> | <b>1130 (2.74%)</b> |

---

**Step 1: Determine the HSR category of the food**

- Category 1 = non-dairy beverages
- Category 1D = dairy beverages
- Category 2 = foods
- Category 2D = dairy foods
- Category 3 = fat, oils
- Category 3D = high fat cheeses

Breakfast cereal product falls under category 2

**Step 2: Calculate baseline points ([click here for lookup tables](#))**

- Energy points = 5
- Saturated fat points = 2
- Total sugars points = 3
- Sodium points = 0

Baseline points = 5 + 2 + 3 + 0, which equals 10

**Step 3: Calculate modifying points**

- Protein points = 5
- Fibre points = 7
- V points = 0

Modifying points = 5 + 7 + 0, which equals 12

| Nutrient           | Value per 100g |
|--------------------|----------------|
| Energy (kJ)        | 1706           |
| Protein (g)        | 9.1            |
| Saturated fat (g)  | 2.5            |
| Total sugars (g)   | 17.3           |
| Sodium (mg)        | 20             |
| Fibre (g)          | 6.8            |
| FVNL%              | 0              |
| Concentrated FVNL% | 14             |

**Step 4: Calculate final HSR score**

Final score = Baseline points – Modifying points  
= 10 – 12  
= -2

**Step 5: Calculate final HSR**

An HSR score of -2 equals a HSR of 4

**Figure S1:** Example calculations of the Health Star Rating and Nutrient Profiling Scoring  
**(A) Calculation of the Health Star Rating – product example: breakfast cereal**

**Step 1: Determine the NPSC category of the food**

- Category 1 = beverages
- Category 2 = foods
- Category 3 = fat, oils

Breakfast cereal product falls under category 2

**Step 2: Calculate baseline points ([click here for lookup tables](#))**

- Energy points = 5
- Saturated fat points = 2
- Total sugars points = 3
- Sodium points = 0

Baseline points = 5 + 2 + 3 + 0, which equals 10

**Step 3: Calculate modifying points**

- Protein points = 5
- Fibre points = 5
- V points = 0

Modifying points = 5 + 5 + 0, which equals 10

| Nutrient           | Value per 100g |
|--------------------|----------------|
| Energy (kJ)        | 1706           |
| Protein (g)        | 9.1            |
| Saturated fat (g)  | 2.5            |
| Total sugars (g)   | 17.3           |
| Sodium (mg)        | 20             |
| Fibre (g)          | 6.8            |
| FVNL%              | 0              |
| Concentrated FVNL% | 14             |

**Step 4: Calculate final NPSC score**

Final score = Baseline points – Modifying points  
= 10 – 10  
= 0

**Step 5: Determine eligibility**

Requires score <4 to be eligible

Product is eligible to display a health claim

**Figure S1:** Example calculations of the Health Star Rating and Nutrient Profiling Scoring  
**(B) Calculation of the Nutrient Profiling Scoring Criterion – product example: breakfast cereal**

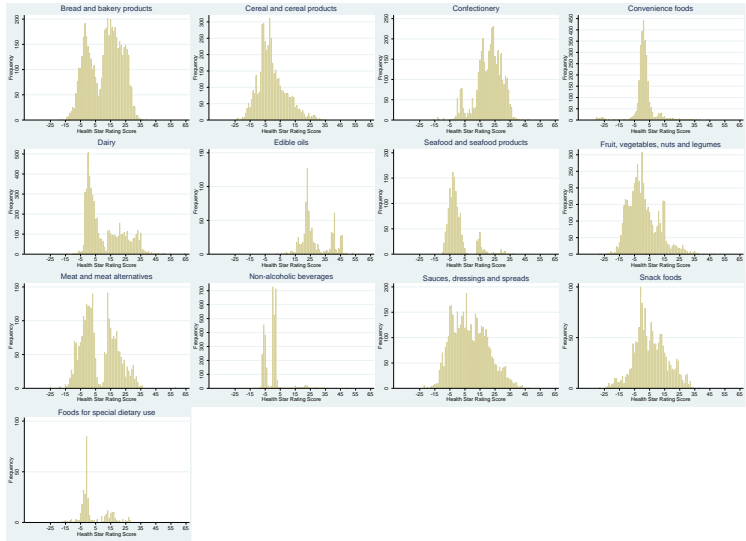

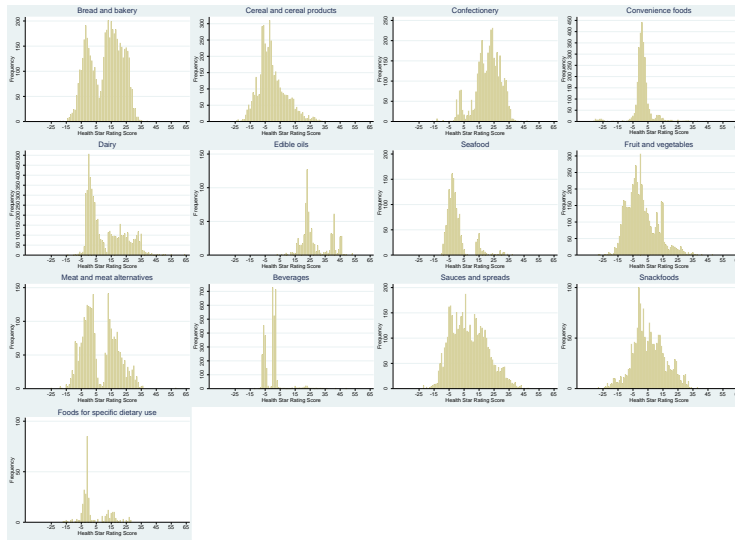

**Figure S2:** Distribution of Health Star Rating Score across food categories

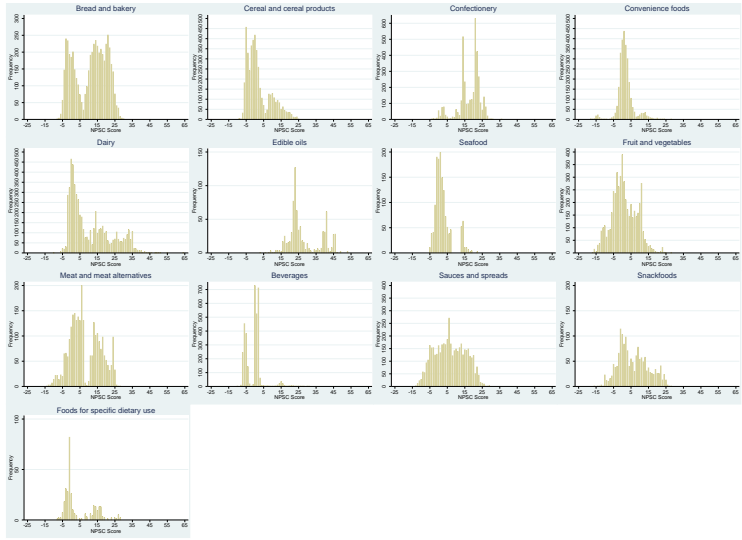



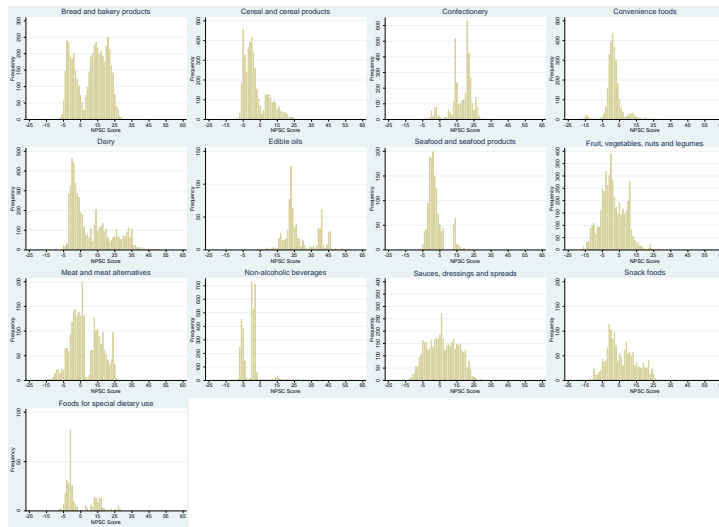

**Figure S3:** Distribution of Nutrient Profile Scoring Criterion Score across food categories



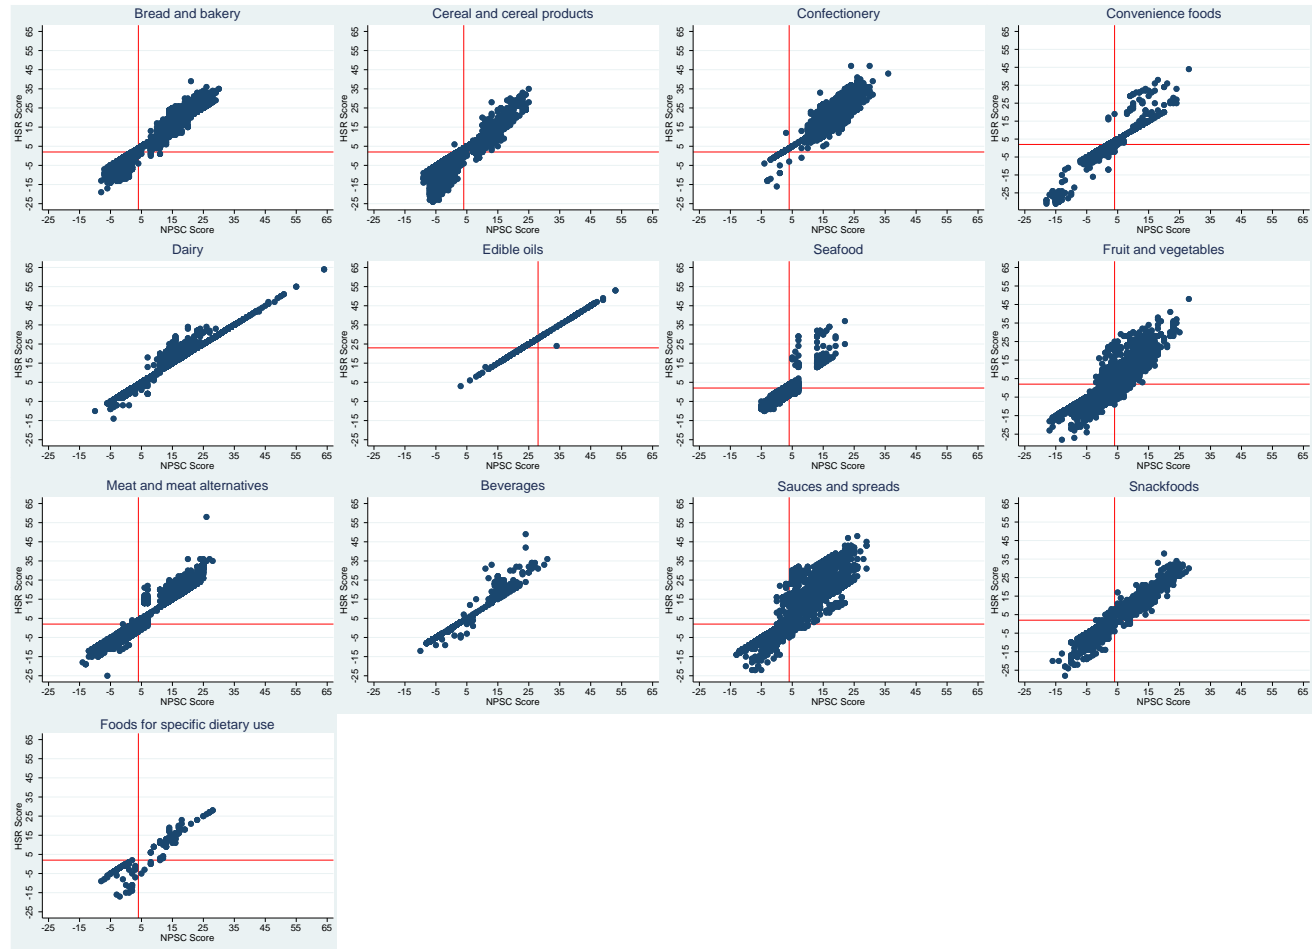

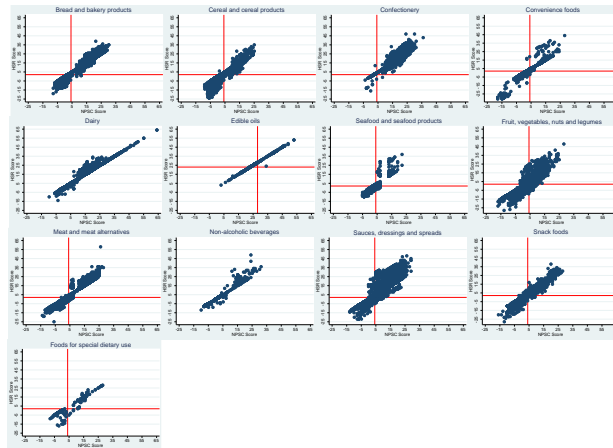

**Figure S4:** Agreement between Health Star Rating Score and Nutrient Profiling Criterion Score (NPSC) by major food category

The horizontal red line indicates the cut-off value to have a HSR star of 3.5 and the vertical red line indicates the cut-off for eligibility to display a health claim under the NPSC. The bottom left and top right corners indicate agreement between the HSR and NPSC and the top left and bottom right indicate disagreement.

Beverages and Dairy categories contained a mixture of NPSC and HSR classifications and so do not include a cut-off line.
